# Supplementary material for: Understanding and predicting the environmental dispersion of iron oxide nanoparticles: a comprehensive study on synthesis, characterisation, and modelling
Source: Royal Society of Chemistry journal article supplement (doi:10.1039/d3en00860f), 2024-10-23
Supplement: d3en00860f1.pdf [file d3en00860f1.pdf]

## ***Supplementary Information***

### **Understanding and Predicting the Environmental Dispersion of Iron Oxide Nanoparticles: A Comprehensive Study on Synthesis, Characterisation, and Modelling.**

Maycon L. de Oliveira <sup>a</sup>, Juliana Cancino-Bernardi <sup>b</sup>, and Márcia A. M. S. da Veiga <sup>a\*</sup>

<sup>a</sup> Department of Chemistry, Laboratory in Applied and Instrumental Analytical Chemistry, Faculty of Philosophy, Science and Letters at Ribeirão Preto, University of São Paulo, 14040-901, Ribeirão Preto – SP, Brazil.

<sup>b</sup> Department of Chemistry, Laboratory in Bioanalytical of Nanosystems, Faculty of Philosophy, Science and Letters at Ribeirão Preto, University of São Paulo, 14040-901, Ribeirão Preto – SP, Brazil.

**\* Correspondence:**

Dr. Márcia A. M. S. da Veiga (**Professor**)

E-mail: [marcia.veiga@usp.br](mailto:marcia.veiga@usp.br)

**Table S1** – Coded values ( $x_1$ : temperature,  $x_2$ : time,  $x_3$ : hardness,  $x_4$ : pH) and Iron Content in Hematite Nanoparticles (HemNPs) Dispersion studied in experimental design.

| Assays | $x_1$ | $x_2$ | $x_3$ | $x_4$ | Rep. 1 | Rep. 2 | Rep. 3 | Mean              |
|--------|-------|-------|-------|-------|--------|--------|--------|-------------------|
| 1      | -1    | -1    | -1    | -1    | 51.31  | 47.76  | 47.93  | 49 ( $\pm 2$ )    |
| 2      | -1    | +1    | -1    | -1    | 60.86  | 60.24  | 58.90  | 60 ( $\pm 1$ )    |
| 3      | +1    | -1    | -1    | -1    | 30.75  | 34.31  | 30.95  | 32 ( $\pm 2$ )    |
| 4      | +1    | +1    | -1    | -1    | 82.06  | 81.38  | 76.56  | 80 ( $\pm 3$ )    |
| 5      | -1    | -1    | +1    | -1    | 21.42  | 25.25  | 22.33  | 23 ( $\pm 2$ )    |
| 6      | -1    | +1    | +1    | -1    | 54.52  | 53.74  | 50.74  | 53 ( $\pm 2$ )    |
| 7      | +1    | -1    | +1    | -1    | 37.06  | 39.06  | 37.89  | 38 ( $\pm 1$ )    |
| 8      | +1    | +1    | +1    | -1    | 168.6  | 158.9  | 161.5  | 163 ( $\pm 5$ )   |
| 9      | -1    | -1    | -1    | +1    | 37.27  | 31.60  | 36.13  | 35 ( $\pm 3$ )    |
| 10     | -1    | +1    | -1    | +1    | 13.12  | 15.09  | 13.79  | 14 ( $\pm 1$ )    |
| 11     | +1    | -1    | -1    | +1    | 31.72  | 32.54  | 28.74  | 31 ( $\pm 2$ )    |
| 12     | +1    | +1    | -1    | +1    | 66.34  | 63.37  | 71.29  | 67 ( $\pm 4$ )    |
| 13     | -1    | -1    | +1    | +1    | 30.11  | 31.79  | 34.10  | 32 ( $\pm 2$ )    |
| 14     | -1    | +1    | +1    | +1    | 47.47  | 49.74  | 43.79  | 47 ( $\pm 3$ )    |
| 15     | +1    | -1    | +1    | +1    | 35.33  | 41.25  | 37.43  | 38 ( $\pm 3$ )    |
| 16     | +1    | +1    | +1    | +1    | 141.9  | 138.1  | 146.0  | 142 ( $\pm 4$ )   |
| 17     | -2    | 0     | 0     | 0     | 6.36   | 5.31   | 6.33   | 6.0 ( $\pm 0.6$ ) |
| 18     | +2    | 0     | 0     | 0     | 75.54  | 80.71  | 80.76  | 79 ( $\pm 3$ )    |
| 19     | 0     | -2    | 0     | 0     | 3.66   | 4.23   | 4.11   | 4.0 ( $\pm 0.3$ ) |
| 20     | 0     | +2    | 0     | 0     | 86.37  | 89.17  | 79.46  | 85 ( $\pm 5$ )    |
| 21     | 0     | 0     | -2    | 0     | 162.6  | 156.4  | 155.1  | 158 ( $\pm 4$ )   |
| 22     | 0     | 0     | +2    | 0     | 213.4  | 203.6  | 207.0  | 208 ( $\pm 5$ )   |
| 23     | 0     | 0     | 0     | -2    | 50.45  | 47.81  | 51.74  | 50 ( $\pm 2$ )    |
| 24     | 0     | 0     | 0     | +2    | 30.14  | 28.56  | 28.29  | 29 ( $\pm 1$ )    |
| 25     | 0     | 0     | 0     | 0     | 73.73  | 72.46  | 69.81  | 72 ( $\pm 2$ )    |
| 26     | 0     | 0     | 0     | 0     | 70.43  | 74.25  | 71.32  | 72 ( $\pm 2$ )    |
| 27     | 0     | 0     | 0     | 0     | 70.32  | 73.25  | 69.43  | 71 ( $\pm 2$ )    |
| 28     | 0     | 0     | 0     | 0     | 73.48  | 72.79  | 69.73  | 72 ( $\pm 2$ )    |
| 29     | 0     | 0     | 0     | 0     | 69.74  | 73.55  | 72.71  | 72 ( $\pm 1$ )    |
| 30     | 0     | 0     | 0     | 0     | 73.28  | 70.18  | 69.54  | 72 ( $\pm 2$ )    |
| 31     | 0     | 0     | 0     | 0     | 70.32  | 73.25  | 69.43  | 71 ( $\pm 2$ )    |

**Table S2** – Regression equations in uncoded units for HemNPs dispersions: full model and reduced model with significant terms ( $x_1$ : temperature,  $x_2$ : time,  $x_3$ : hardness, and  $x_4$ : pH).

| Full Quadratic CCRD | Regression Equations in Uncoded Units for HemNPs dispersion                                                                                                                                                             |
|---------------------|-------------------------------------------------------------------------------------------------------------------------------------------------------------------------------------------------------------------------|
| All terms           | $-508 + 16.05 x_1 - 3.29 x_2 - 1.821 x_3 + 168.5 x_4 - 0.414 x_1^2 - 0.0752 x_2^2 + 0.002405 x_3^2 - 11.70 x_4^2 + 0.2872 x_1 x_2 + 0.02504 x_1 x_3 - 1.019 x_1 x_4 + 0.00901 x_2 x_3 + 0.118 x_2 x_4 + 0.0361 x_3 x_4$ |
| Significative terms | $-436 + 8.92 x_1 - 2.46 x_2 - 1.569 x_3 + 158.2 x_4 - 0.414 x_1^2 - 0.0752 x_2^2 + 0.002405 x_3^2 - 11.70 x_4^2 + 0.2872 x_1 x_2 + 0.02504 x_1 x_3 + 0.00901 x_2 x_3$                                                   |

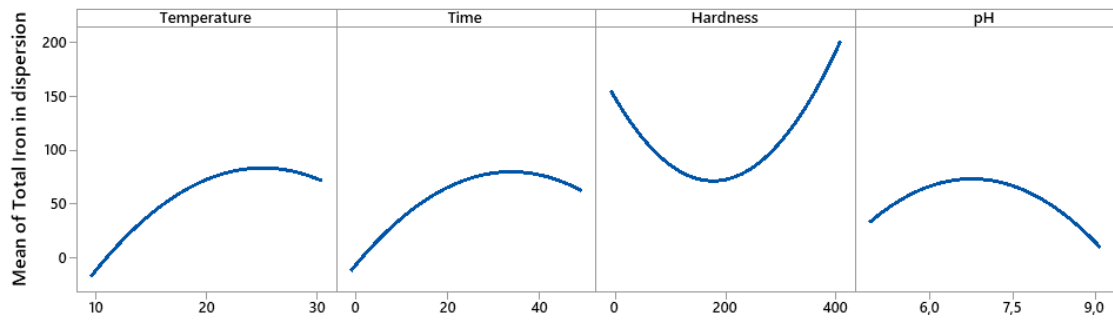

**Figure S1** – Main effects plot for Total Iron in Hematite nanoparticles dispersions with all model terms included.

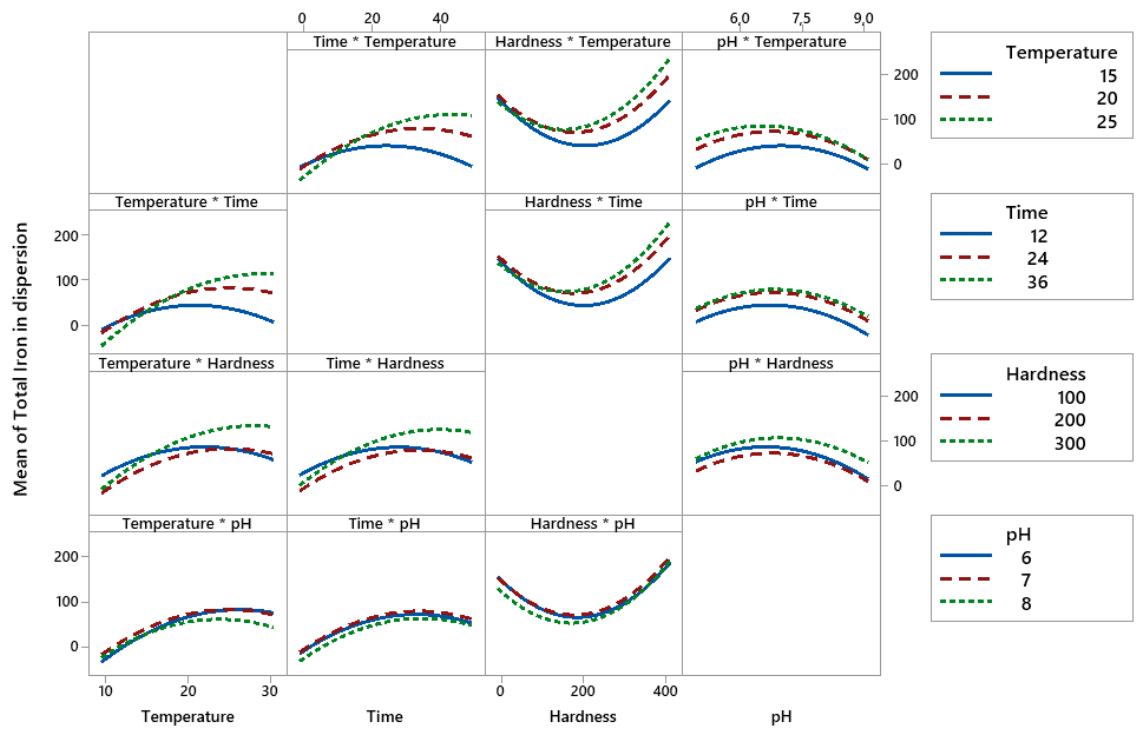

**Figure S2** – Interaction plot for Total Iron in Hematite nanoparticle dispersions with all model terms included.

**Table S3** – Coded values ( $x_1$ : temperature,  $x_2$ : time,  $x_3$ : hardness,  $x_4$ : pH) and Iron Content in Goethite Nanoparticles (GoeNPs) Dispersion studied in experimental design.

| Assays | $x_1$ | $x_2$ | $x_3$ | $x_4$ | Rep. 1 | Rep. 2 | Rep. 3 | Mean           |
|--------|-------|-------|-------|-------|--------|--------|--------|----------------|
| 1      | -1    | -1    | -1    | -1    | 230.9  | 230.1  | 228.9  | 230 ( $\pm$ 1) |
| 2      | -1    | +1    | -1    | -1    | 281.7  | 271.7  | 277.6  | 277 ( $\pm$ 5) |
| 3      | +1    | -1    | -1    | -1    | 144.8  | 151.6  | 144.6  | 147 ( $\pm$ 4) |
| 4      | +1    | +1    | -1    | -1    | 245.4  | 248.3  | 253.3  | 249 ( $\pm$ 4) |
| 5      | -1    | -1    | +1    | -1    | 242.5  | 247.5  | 247.9  | 246 ( $\pm$ 3) |
| 6      | -1    | +1    | +1    | -1    | 334.1  | 331.8  | 330.1  | 332 ( $\pm$ 2) |
| 7      | +1    | -1    | +1    | -1    | 171.2  | 171.1  | 167.7  | 170 ( $\pm$ 2) |
| 8      | +1    | +1    | +1    | -1    | 280.3  | 277.0  | 276.7  | 278 ( $\pm$ 2) |
| 9      | -1    | -1    | -1    | +1    | 202.4  | 207.5  | 202.1  | 204 ( $\pm$ 3) |
| 10     | -1    | +1    | -1    | +1    | 313.0  | 309.7  | 313.3  | 312 ( $\pm$ 2) |
| 11     | +1    | -1    | -1    | +1    | 171.6  | 179.5  | 176.9  | 176 ( $\pm$ 4) |
| 12     | +1    | +1    | -1    | +1    | 214.4  | 209.5  | 209.0  | 211 ( $\pm$ 3) |
| 13     | -1    | -1    | +1    | +1    | 198.0  | 200.0  | 196.0  | 198 ( $\pm$ 2) |
| 14     | -1    | +1    | +1    | +1    | 284.6  | 277.5  | 277.9  | 280 ( $\pm$ 4) |
| 15     | +1    | -1    | +1    | +1    | 172.6  | 169.7  | 164.7  | 169 ( $\pm$ 4) |
| 16     | +1    | +1    | +1    | +1    | 256.7  | 260.0  | 260.3  | 259 ( $\pm$ 2) |
| 17     | -2    | 0     | 0     | 0     | 415.5  | 421.5  | 423.0  | 420 ( $\pm$ 4) |
| 18     | +2    | 0     | 0     | 0     | 317.5  | 308.3  | 316.2  | 314 ( $\pm$ 5) |
| 19     | 0     | -2    | 0     | 0     | 26.97  | 25.05  | 22.97  | 25 ( $\pm$ 2)  |
| 20     | 0     | +2    | 0     | 0     | 174.1  | 166.1  | 169.8  | 170 ( $\pm$ 4) |
| 21     | 0     | 0     | -2    | 0     | 489.7  | 495.5  | 493.8  | 493 ( $\pm$ 3) |
| 22     | 0     | 0     | +2    | 0     | 521.3  | 523.5  | 527.2  | 524 ( $\pm$ 3) |
| 23     | 0     | 0     | 0     | -2    | 132.0  | 133.0  | 131.0  | 132 ( $\pm$ 1) |
| 24     | 0     | 0     | 0     | +2    | 108.7  | 111.8  | 112.5  | 111 ( $\pm$ 2) |
| 25     | 0     | 0     | 0     | 0     | 477.5  | 485.0  | 483.5  | 482 ( $\pm$ 4) |
| 26     | 0     | 0     | 0     | 0     | 492.3  | 496.2  | 493.6  | 494 ( $\pm$ 2) |
| 27     | 0     | 0     | 0     | 0     | 472.4  | 473.3  | 476.3  | 474 ( $\pm$ 2) |
| 28     | 0     | 0     | 0     | 0     | 478.9  | 480.8  | 480.4  | 480 ( $\pm$ 1) |
| 29     | 0     | 0     | 0     | 0     | 484.6  | 482.8  | 484.5  | 484 ( $\pm$ 1) |
| 30     | 0     | 0     | 0     | 0     | 493.4  | 488.6  | 488.0  | 490 ( $\pm$ 3) |
| 31     | 0     | 0     | 0     | 0     | 481.4  | 488.7  | 487.9  | 486 ( $\pm$ 4) |

**Table S4** – Regression equations in uncoded units for GoeNPs dispersions: full model and reduced model with significant terms ( $x_1$ : temperature,  $x_2$ : time,  $x_3$ : hardness, and  $x_4$ : pH).

| Full Quadratic CCRD | Regression Equations in Uncoded Units for GoeNPs dispersion                                                                                                                                                             |
|---------------------|-------------------------------------------------------------------------------------------------------------------------------------------------------------------------------------------------------------------------|
| All terms           | $- 6205 + 173.5 x_1 + 6.65 x_2 + 0.376 x_3 + 1371.4 x_4 - 4.132 x_1^2 - 0.2501 x_2^2 - 0.000062 x_3^2 - 97.40 x_4^2 + 0.016 x_1 x_2 + 0.0091 x_1 x_3 - 0.36 x_1 x_4 + 0.00308 x_2 x_3 + 0.319 x_2 x_4 - 0.0755 x_3 x_4$ |
| Significative terms | $- 6139 + 173.09 x_1 + 9.79 x_2 + 1355.9 x_4 - 4.130 x_1^2 - 0.2496 x_2^2 - 97.33 x_4^2$                                                                                                                                |

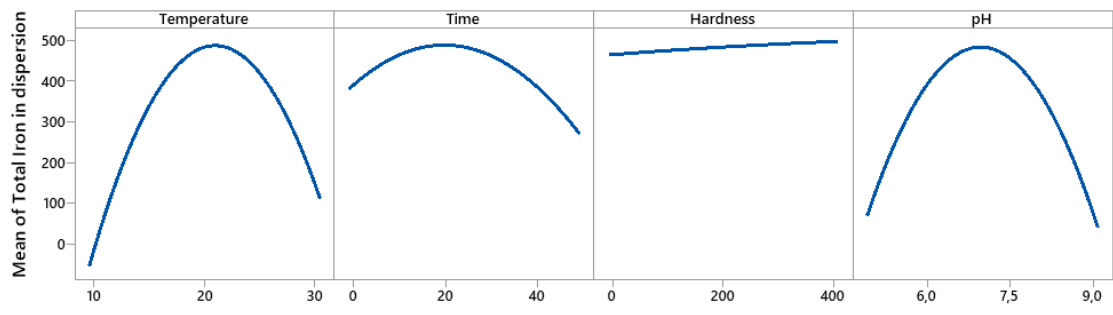

**Figure S3** – Main effects plot for Total Iron in Goethite nanoparticles dispersions with all model terms included.



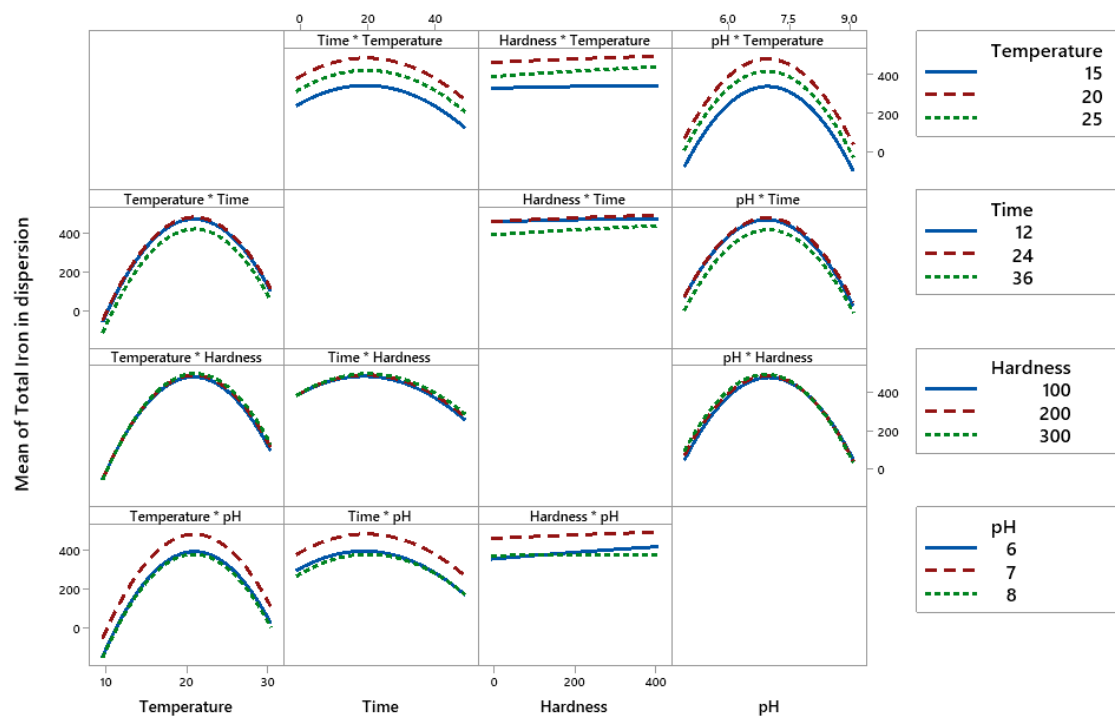

**Figure S4** – Interaction plot for Total Iron in Goethite nanoparticle dispersions with all model terms included.

**Table S5** – Coded values ( $x_1$ : temperature,  $x_2$ : time,  $x_3$ : hardness,  $x_4$ : pH) and Iron Content in Magnetite Nanoparticles (MagNPs) dispersion studied in experimental design.

| Assays | $x_1$ | $x_2$ | $x_3$ | $x_4$ | Rep. 1 | Rep. 2 | Rep. 3 | Mean             |
|--------|-------|-------|-------|-------|--------|--------|--------|------------------|
| 1      | -1    | -1    | -1    | -1    | 565.7  | 566.3  | 563.0  | 565 ( $\pm 3$ )  |
| 2      | -1    | +1    | -1    | -1    | 552.2  | 549.7  | 546.0  | 549 ( $\pm 4$ )  |
| 3      | +1    | -1    | -1    | -1    | 764.2  | 755.8  | 769.0  | 763 ( $\pm 9$ )  |
| 4      | +1    | +1    | -1    | -1    | 743.6  | 739.1  | 741.3  | 741 ( $\pm 8$ )  |
| 5      | -1    | -1    | +1    | -1    | 507.2  | 509.7  | 510.1  | 509 ( $\pm 5$ )  |
| 6      | -1    | +1    | +1    | -1    | 479.8  | 481.3  | 476.9  | 479 ( $\pm 3$ )  |
| 7      | +1    | -1    | +1    | -1    | 601    | 602.5  | 601.7  | 602 ( $\pm 2$ )  |
| 8      | +1    | +1    | +1    | -1    | 556.5  | 552    | 557.4  | 556 ( $\pm 4$ )  |
| 9      | -1    | -1    | -1    | +1    | 548.6  | 551    | 550.4  | 550 ( $\pm 5$ )  |
| 10     | -1    | +1    | -1    | +1    | 581.5  | 577.8  | 577.6  | 579 ( $\pm 6$ )  |
| 11     | +1    | -1    | -1    | +1    | 710.3  | 711.5  | 706.2  | 710 ( $\pm 7$ )  |
| 12     | +1    | +1    | -1    | +1    | 740.8  | 736.1  | 737.0  | 738 ( $\pm 9$ )  |
| 13     | -1    | -1    | +1    | +1    | 552.5  | 548.1  | 546.4  | 549 ( $\pm 6$ )  |
| 14     | -1    | +1    | +1    | +1    | 559    | 563.3  | 557.7  | 560 ( $\pm 5$ )  |
| 15     | +1    | -1    | +1    | +1    | 600.4  | 603.6  | 596.0  | 600 ( $\pm 4$ )  |
| 16     | +1    | +1    | +1    | +1    | 603.8  | 606.2  | 602.1  | 604 ( $\pm 2$ )  |
| 17     | -2    | 0     | 0     | 0     | 101.4  | 103.7  | 101.0  | 102 ( $\pm 2$ )  |
| 18     | +2    | 0     | 0     | 0     | 352.1  | 354.7  | 349.8  | 352 ( $\pm 3$ )  |
| 19     | 0     | -2    | 0     | 0     | 10.73  | 8.91   | 10.4   | 10 ( $\pm 1$ )   |
| 20     | 0     | +2    | 0     | 0     | 0      | 0      | 0.0    | 0 ( $\pm 1$ )    |
| 21     | 0     | 0     | -2    | 0     | 1203.8 | 1211.7 | 1199.5 | 1205 ( $\pm 9$ ) |
| 22     | 0     | 0     | +2    | 0     | 1027.2 | 1021.7 | 1024.4 | 1025 ( $\pm 8$ ) |
| 23     | 0     | 0     | 0     | -2    | 1056.2 | 1064.4 | 1052.7 | 1058 ( $\pm 8$ ) |
| 24     | 0     | 0     | 0     | +2    | 1092.4 | 1096.9 | 1090.1 | 1093 ( $\pm 6$ ) |
| 25     | 0     | 0     | 0     | 0     | 1103.5 | 1104.8 | 1097.7 | 1102 ( $\pm 7$ ) |
| 26     | 0     | 0     | 0     | 0     | 1100.1 | 1104.2 | 1095.8 | 1100 ( $\pm 6$ ) |
| 27     | 0     | 0     | 0     | 0     | 1098.4 | 1099.1 | 1099.6 | 1099 ( $\pm 8$ ) |
| 28     | 0     | 0     | 0     | 0     | 1102.7 | 1099.4 | 1100.2 | 1101 ( $\pm 6$ ) |
| 29     | 0     | 0     | 0     | 0     | 1100.8 | 1102.0 | 1097.2 | 1100 ( $\pm 7$ ) |
| 30     | 0     | 0     | 0     | 0     | 1103.2 | 1104.7 | 1099.1 | 1102 ( $\pm 9$ ) |
| 31     | 0     | 0     | 0     | 0     | 1100.8 | 1097.3 | 1105.2 | 1102 ( $\pm 6$ ) |

**Table S6** – Regression equations in uncoded units for MagNPs dispersions: full model with all terms ( $x_1$ : temperature,  $x_2$ : time,  $x_3$ : hardness, and  $x_4$ : pH).

| Full Quadratic CCRD | Regression Equations in Uncoded Units for MagNPs dispersion                                                                                                                                                                                                                             |
|---------------------|-----------------------------------------------------------------------------------------------------------------------------------------------------------------------------------------------------------------------------------------------------------------------------------------|
| All terms           | $  \begin{aligned}  & -4344.4 + 424.90 x_1 + 88.638 x_2 - 0.7380 x_3 + 47.76 x_4 - 10.9737 x_1^2 - 1.51973 x_2^2 + 0.000316 x_3^2 \\  & - 6.704 x_4^2 - 0.03125 x_1 x_2 - 0.01000 x_1 x_3 + 2.325 x_1 x_4 - 0.023125 x_2 x_3 - 0.7604 x_2 x_4 \\  & + 0.13000 x_3 x_4  \end{aligned}  $ |

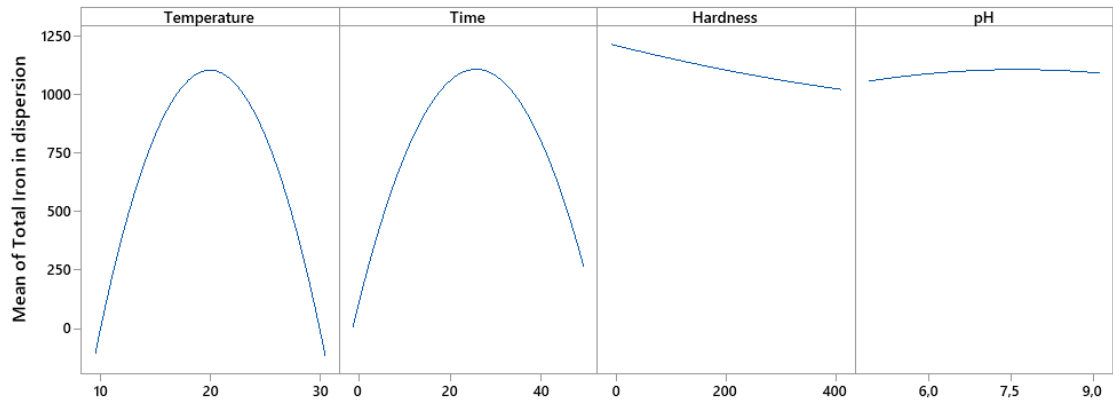

**Figure S5** – Main effects plot for Total Iron in Magnetite nanoparticles dispersions with all model terms included.

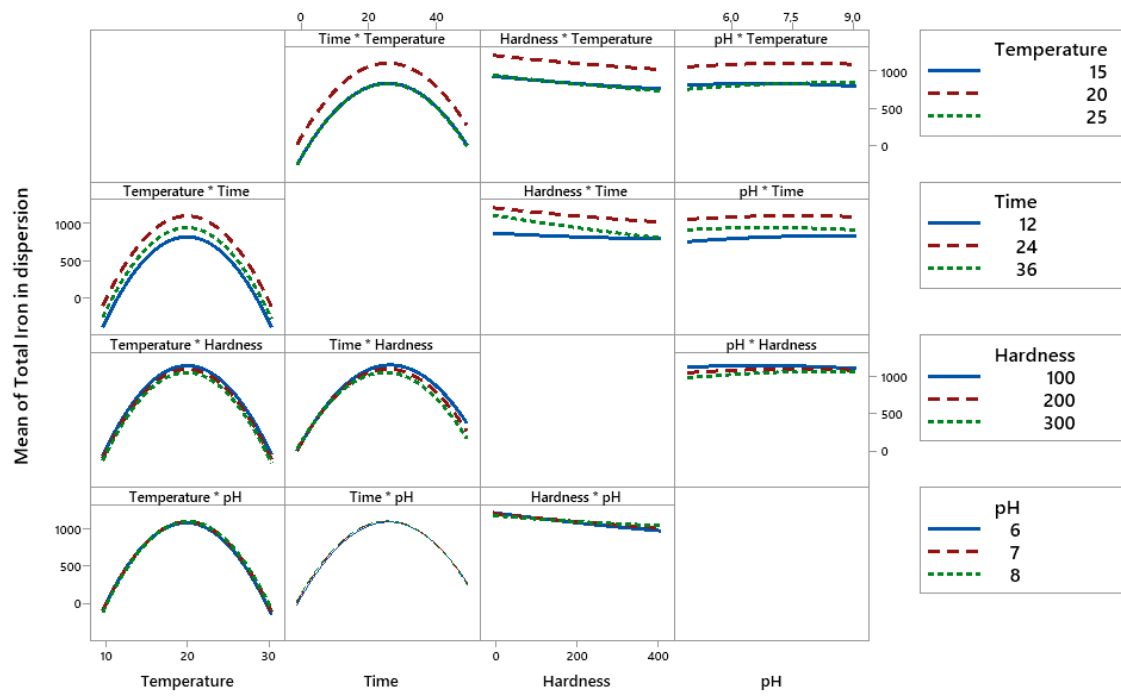

**Figure S6** – Interaction plot for Total Iron in Magnetite nanoparticle dispersions with all model terms included.
